# Supplementary material for: Ligand exchange processes between molybdenum and zinc additives in lubricants: evidence from NMR (1H, 13C, 31P) and HPLC-MS analysis
Source: Royal Society of Chemistry journal article supplement (doi:10.1039/d0ra07329f), 2020-01-01

## Electronic Supplementary Information

### Ligand exchange processes between molybdenum and zinc additives in lubricants: evidence from NMR ( $^1\text{H}$ , $^{13}\text{C}$ , $^{31}\text{P}$ ) and HPLC-MS analysis

Y.M. Kiw,<sup>a,b</sup> P. Schaeffer,<sup>a</sup> P. Adam,<sup>a\*</sup> B. Thiébaud,<sup>b</sup> C. Boyer,<sup>b</sup> G. Papin<sup>b</sup>

<sup>a</sup> University of Strasbourg, CNRS, Institut de chimie de Strasbourg UMR 7177, F-67000 Strasbourg, France

<sup>b</sup> TOTAL Solaize Research Center, BP22-69360 Cedex, France

## Supplementary Material

**Figure 1S:** (a) Mass spectra and (b) Extracted Ion Chromatogram (HPLC-MS, APPI, positive mode) of compounds: (i) **2a**; (ii) **2b**; (iii) **2c**.

**Figure 2S:** Calibration curves for Mo(DTC)<sub>2</sub>. (a) **2a**; (b) **2b**; (c) **2c** (HPLC-MS, APPI, positive mode). IS: Internal standard.

**Figure 3S:** Reference NMR spectra (CDCl<sub>3</sub>, 25 °C) of Mo(DTP)<sub>2</sub> **1** used for the investigation of DTC/DTP ligand exchange reactions. (a)  $^1\text{H}$ -NMR spectrum (0.0-5.0 ppm, 500 MHz); (b)  $^{13}\text{C}$ -NMR spectrum (0-210 ppm, 125 MHz). \*: Impurities.

**Figure 4S:** Reference NMR spectra (CDCl<sub>3</sub>, 25 °C) of Mo(DTC)<sub>2</sub> **2d** used for the investigation of DTC/DTP ligand exchange reactions (a)  $^1\text{H}$ -NMR spectrum (0.0-5.0 ppm, 500 MHz); (b)  $^{13}\text{C}$ -NMR spectrum (0-210 ppm, 125 MHz). \*: Impurities.

**Figure 5S:** Reference NMR spectra (CDCl<sub>3</sub>, 25 °C) of Zn(DTC)<sub>2</sub> **3a** used for the investigation of DTC/DTP ligand exchange reactions. (a)  $^1\text{H}$ -NMR spectrum (0.0-5.0 ppm, 500 MHz); (b)  $^{13}\text{C}$ -NMR spectrum (0-210 ppm, 125 MHz). \*: Impurities.

**Figure 6S:** Reference NMR spectra (CDCl<sub>3</sub>, 25 °C) of Zn(DTP)<sub>2</sub> **4a** used for the investigation of DTC/DTP ligand exchange reactions. (a)  $^1\text{H}$ -NMR spectrum (0.0-5.0 ppm, 500 MHz); (b)  $^{13}\text{C}$ -NMR spectrum (0-210 ppm, 125 MHz). \*: Impurities.

**Figure 7S:** Partial  $^1\text{H}$ -NMR reference spectra (3.0-5.0 ppm, 500 MHz, D<sub>8</sub>-toluene, 105 °C) of additives (a) **1**; (b) **2d**; (c) **3a**; (d) **4a** used for the investigation of DTC/DTP ligand exchange reactions. \*: Impurities.

**Figure 8S:**  $^{31}\text{P}$ -NMR reference spectra (90-115 ppm, 121 MHz, CDCl<sub>3</sub>, 25 °C) of additives (a) **1**; (b) **4a** used for the investigation of DTC/DTP ligand exchange reactions. \*: Impurities.

**Figure 9S:** Partial  $^{31}\text{P}$ -NMR spectrum (90-115 pp, 162 MHz, D<sub>8</sub>-toluene, 105 °C) of a mixture of Mo(DTP)<sub>2</sub> **1** and Zn(DTC)<sub>2</sub> **3a** in a 4:1 molar ratio after 15 min. \*: Impurities.

**Figure 10S:** Partial  $^1\text{H}$ -NMR spectra (3.0-5.0 ppm, 500 MHz, CDCl<sub>3</sub>, 25 °C) of a mixture of Mo(DTP)<sub>2</sub> **1** and Zn(DTC)<sub>2</sub> **3a** in a 1:1 molar ratio after (a) 1 h; (b) 17 h; (c) 95 h. \*: Impurities.

**Figure 11S:** Partial  $^{31}\text{P}$ -NMR spectra (90-115 ppm, 121 MHz,  $\text{CDCl}_3$ , 25 °C) of a mixture of  $\text{Mo}(\text{DTP})_2$  **1** and  $\text{Zn}(\text{DTC})_2$  **3a** in a 1:1 molar ratio after **(a)** 1 h, **(b)** 17 h; **(c)** 95 h. \* : Impurities.

**Figure 12S:** Partial NMR spectra ( $\text{CDCl}_3$ , 25 °C) of a mixture of  $\text{Mo}(\text{DTC})_2$  **2d** and  $\text{Zn}(\text{DTP})_2$  **4a** in a 2:1 molar ratio after 24 h. **(a)**  $^1\text{H}$ -NMR spectrum (3.0-5.0 ppm, 500 MHz); **(b)**  $^{31}\text{P}$ -NMR spectrum (90-115 ppm, 121 MHz).

**Figure 13S:** **(a)** Mass spectra and **(b)** Extracted Ion Chromatogram (HPLC-MS, APPI, positive mode) of compounds **2e**, **2f**, and **2g**.

**Figure 1S: (a) Mass spectra and (b) Extracted Ion Chromatogram (HPLC-MS, APPI, positive mode) of compounds: (i) 2a; (ii) 2b; (iii) 2c.**

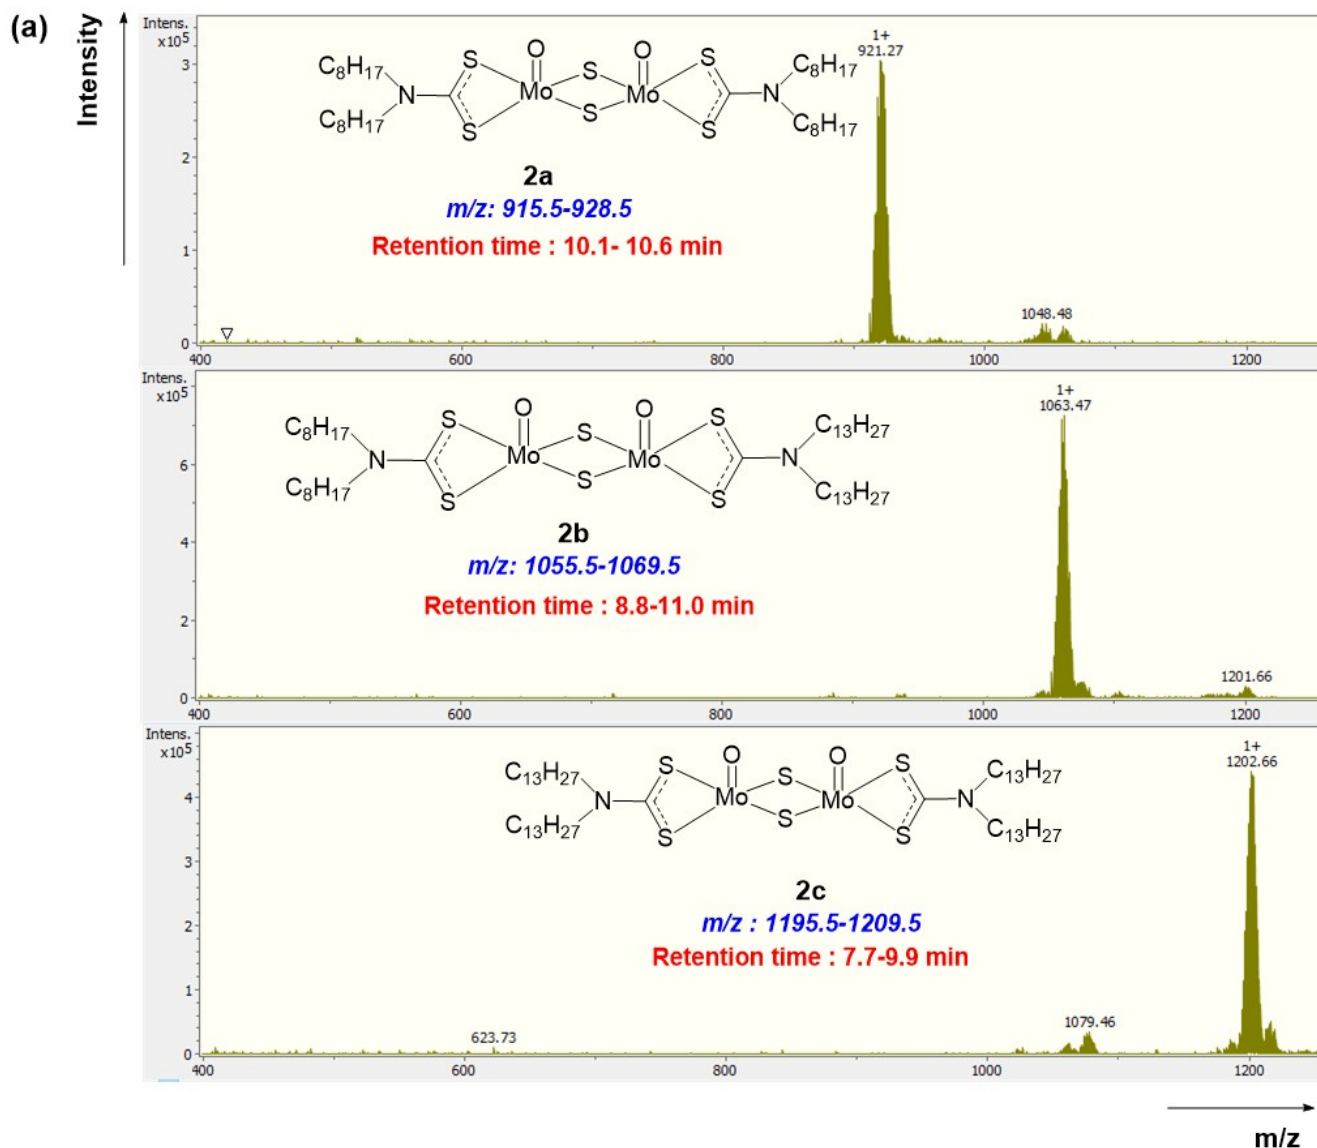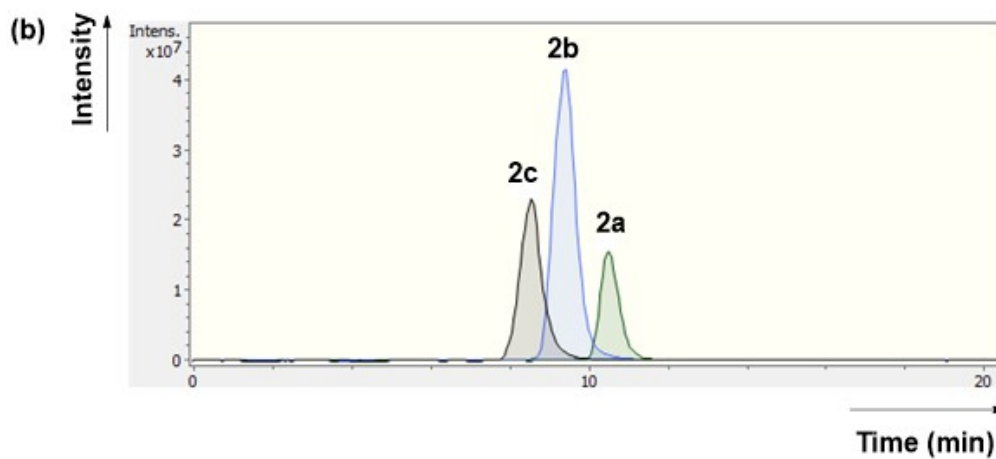

**Figure 2S:** Calibration curves for Mo(DTC)<sub>2</sub>. (a) **2a**; (b) **2b**; (c) **2c** (HPLC-MS, APPI, positive mode). IS: Internal standard.

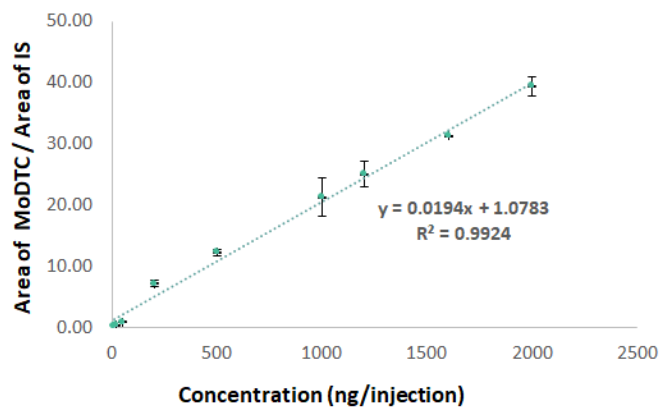

(a) **2a**

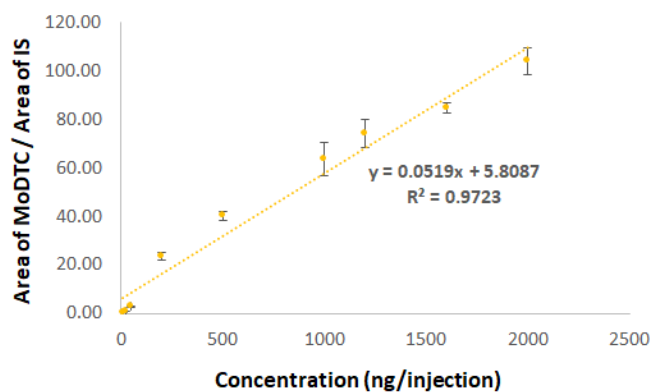

(b) **2b**

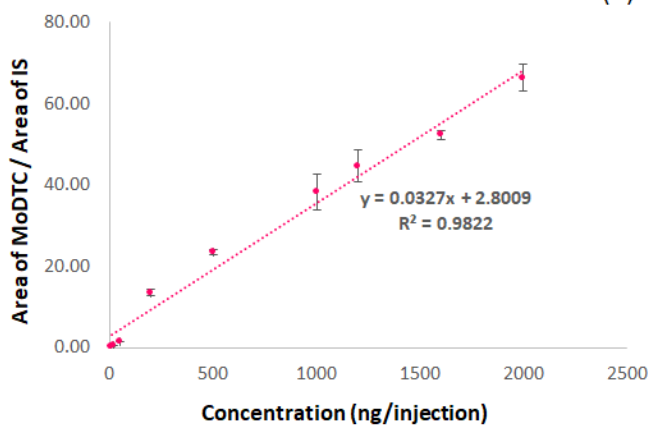

(c) **2c**

**Figure 3S:** Reference NMR spectra (CDCl<sub>3</sub>, 25 °C) of Mo(DTP)<sub>2</sub> **1** used for the investigation of DTC/DTP ligand exchange reactions. **(a)** <sup>1</sup>H-NMR spectrum (0.0-5.0 ppm, 500 MHz); **(b)** <sup>13</sup>C-NMR spectrum (0-210 ppm, 125 MHz). \*: Impurities.

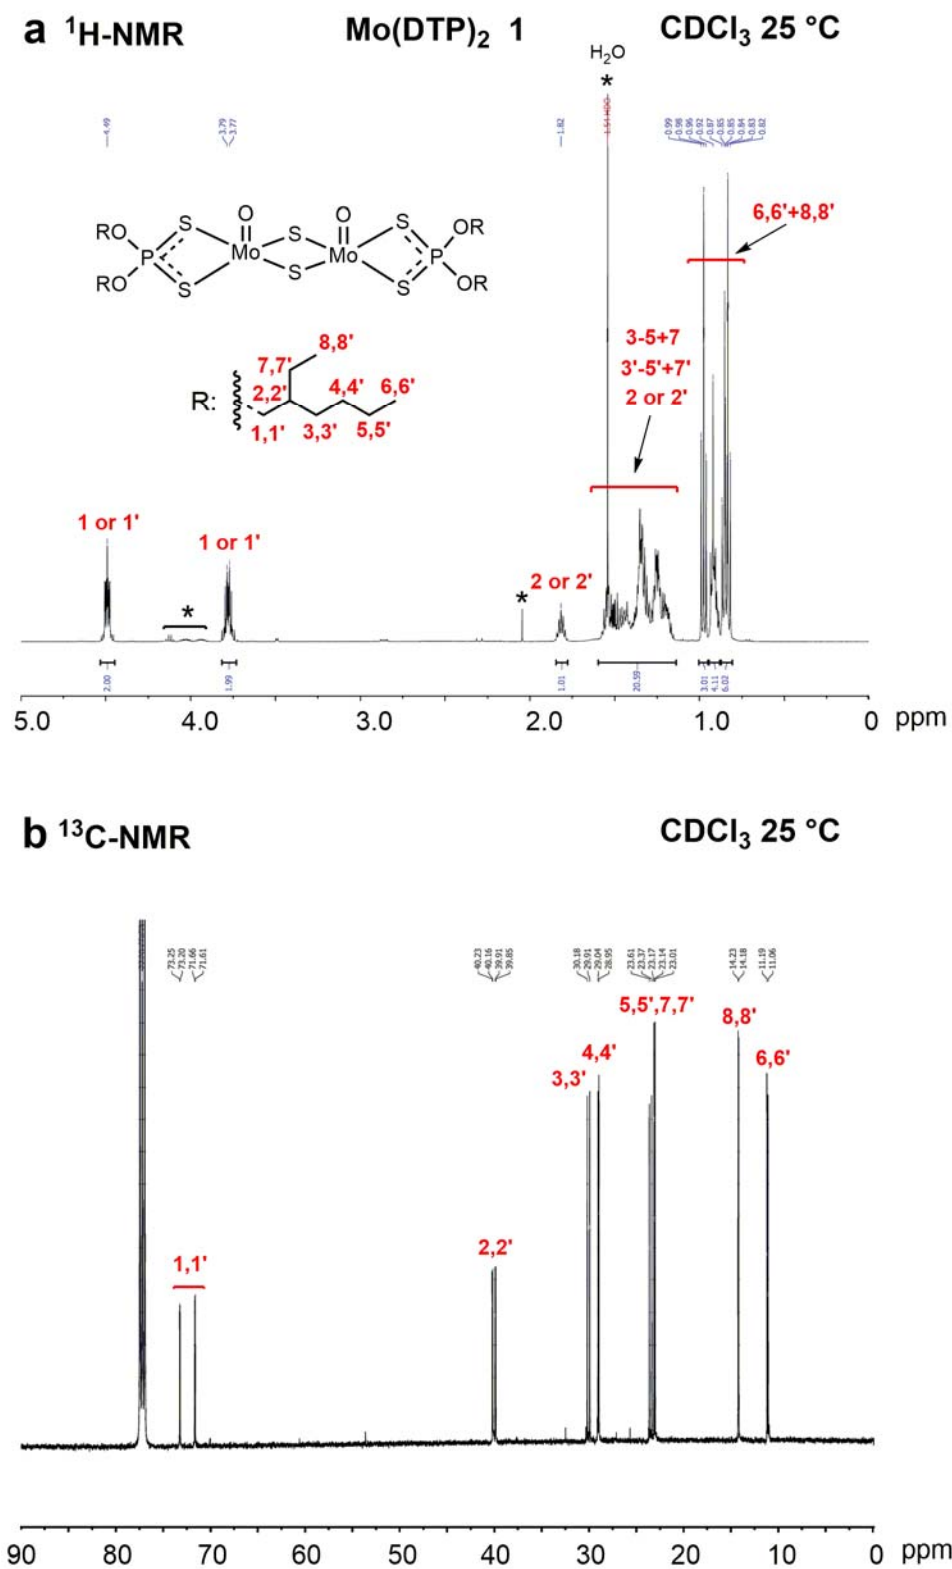

**Figure 4S:** Reference NMR spectra ( $\text{CDCl}_3$ , 25 °C) of  $\text{Mo}(\text{DTC})_2$  **2d** used for the investigation of DTC/DTP ligand exchange reactions **(a)**  $^1\text{H}$ -NMR spectrum (0.0-5.0 ppm, 500 MHz); **(b)**  $^{13}\text{C}$ -NMR spectrum (0-210 ppm, 125 MHz). \*: Impurities.

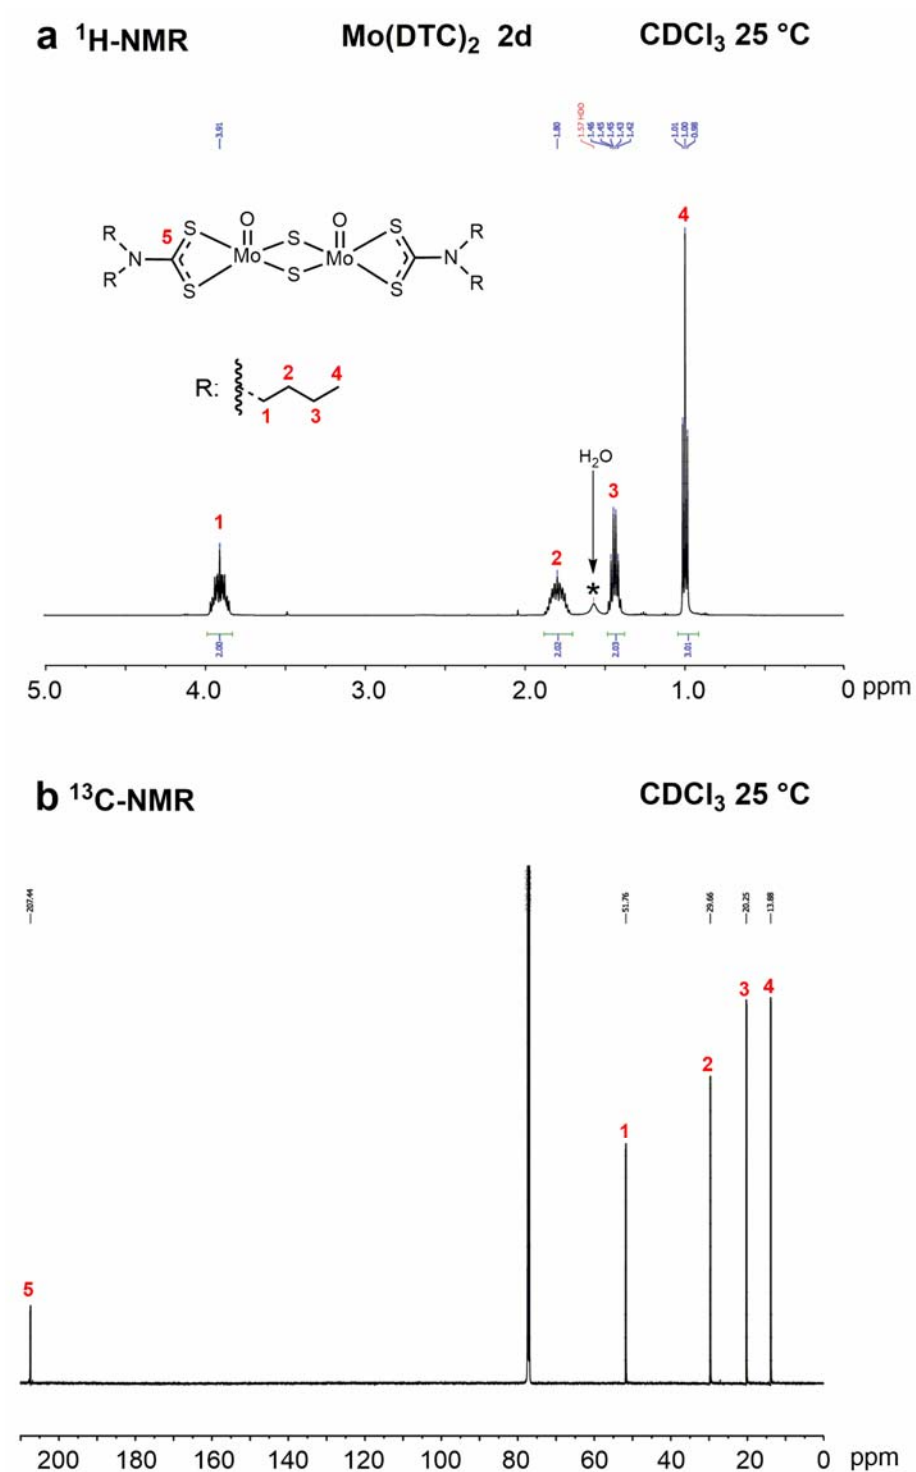

**Figure 5S:** Reference NMR spectra ( $\text{CDCl}_3$ , 25 °C) of  $\text{Zn}(\text{DTC})_2$  **3a** used for the investigation of DTC/DTP ligand exchange reactions. **(a)**  $^1\text{H}$ -NMR spectrum (0.0-5.0 ppm, 500 MHz); **(b)**  $^{13}\text{C}$ -NMR spectrum (0-210 ppm, 125 MHz). \*: Impurities.

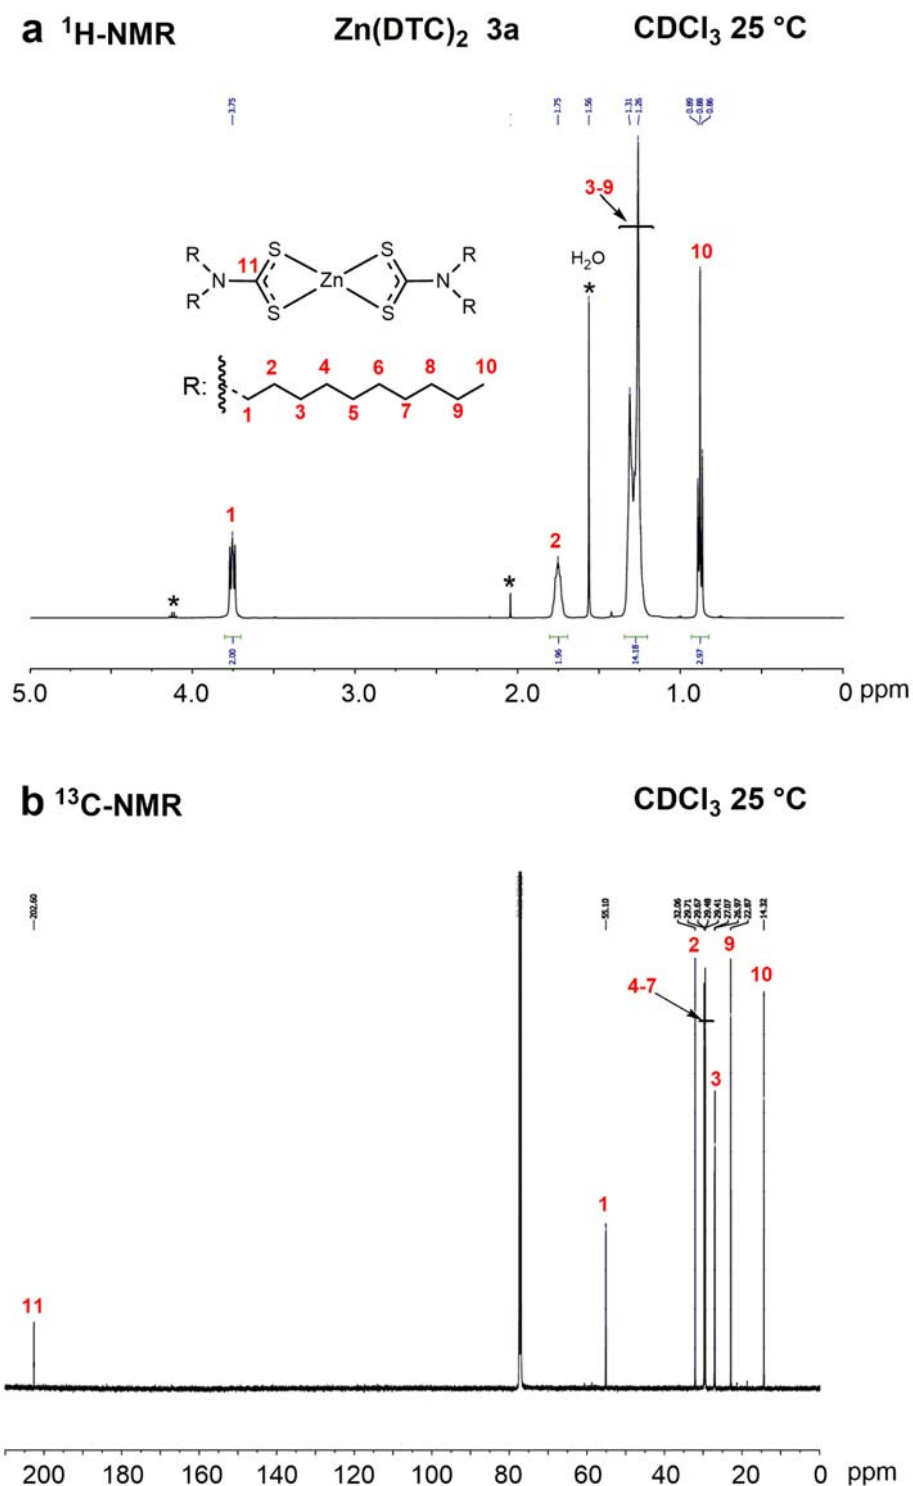

**Figure 6S:** Reference NMR spectra ( $\text{CDCl}_3$ , 25 °C) of  $\text{Zn}(\text{DTP})_2$  **4a** used for the investigation of DTC/DTP ligand exchange reactions. **(a)**  $^1\text{H}$ -NMR spectrum (0.0-5.0 ppm, 500 MHz); **(b)**  $^{13}\text{C}$ -NMR spectrum (0-210 ppm, 125 MHz). \*: Impurities.

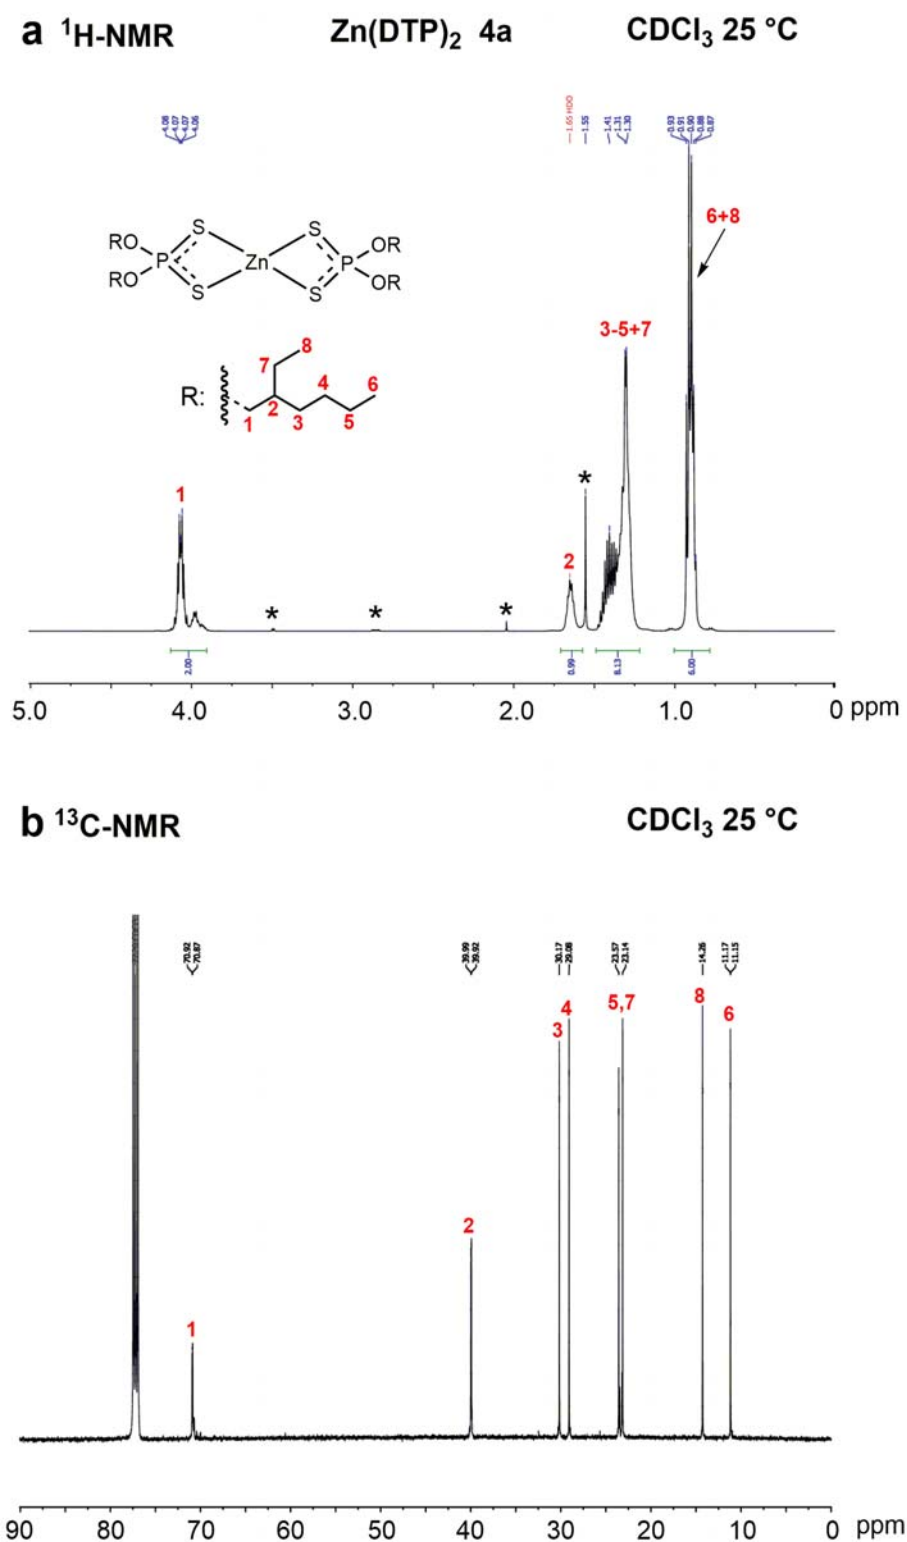



**Figure 7S:** Partial  $^1\text{H-NMR}$  reference spectra (3.0-5.0 ppm, 500 MHz,  $\text{D}_8\text{-toluene}$ , 105  $^\circ\text{C}$ ) of additives **(a) 1**; **(b) 2d**; **(c) 3a**; **(d) 4a** used for the investigation of DTC/DTP ligand exchange reactions. \*: Impurities.

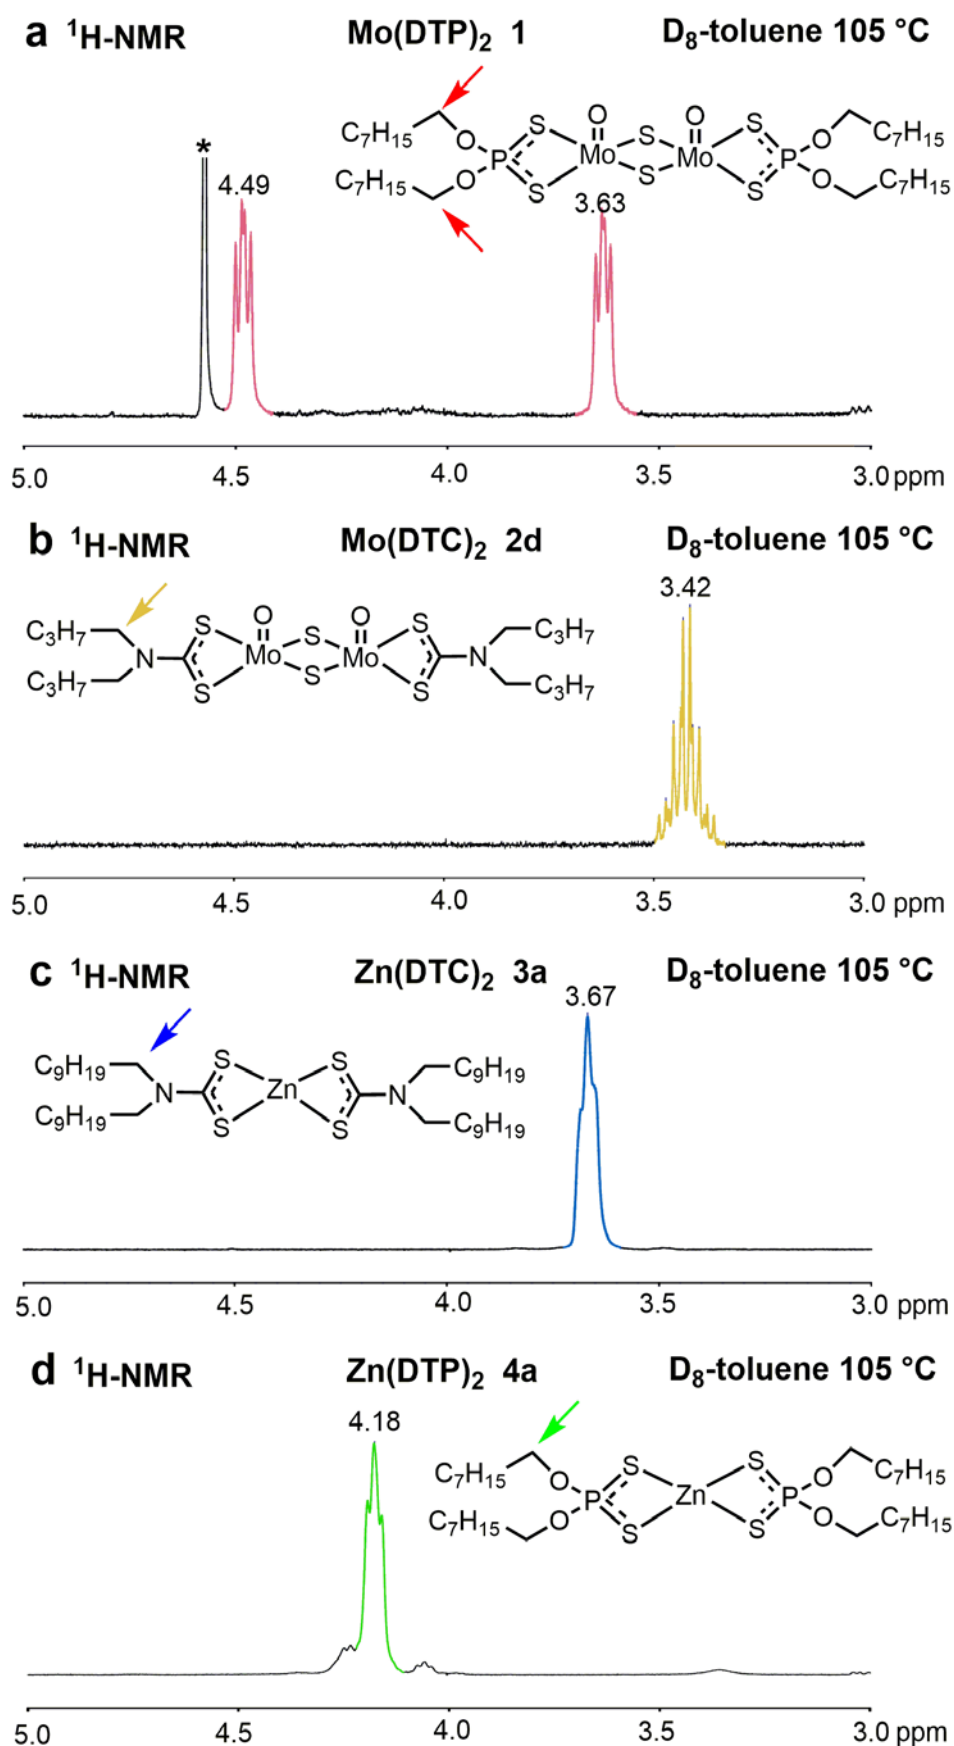

**Figure 8S:**  $^{31}\text{P}$ -NMR reference spectra (90-115 ppm, 121 MHz,  $\text{CDCl}_3$ , 25 °C) of additives **(a) 1**; **(b) 4a** used for the investigation of DTC/DTP ligand exchange reactions. \*: Impurities.

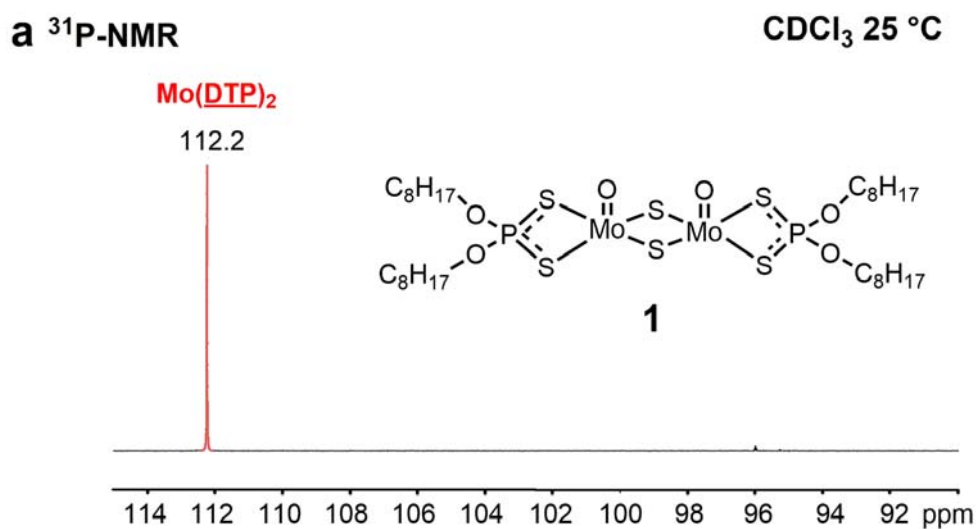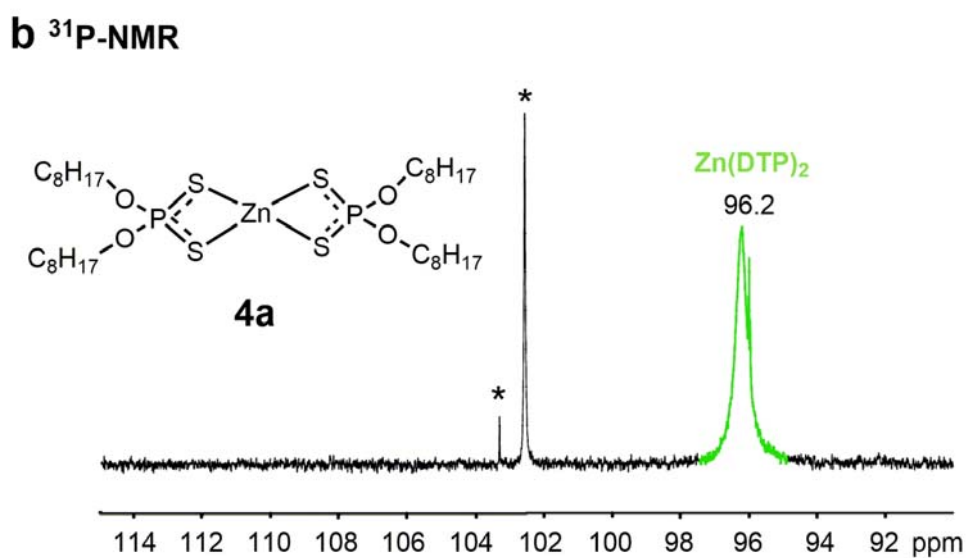

**Figure 9S:** Partial  $^{31}\text{P}$ -NMR spectrum (90-115 pp, 162 MHz,  $\text{D}_8$ -toluene, 105 °C) of a mixture of  $\text{Mo}(\text{DTP})_2$  **1** and  $\text{Zn}(\text{DTC})_2$  **3a** in a 4:1 molar ratio after 15 min. \*: Impurities.

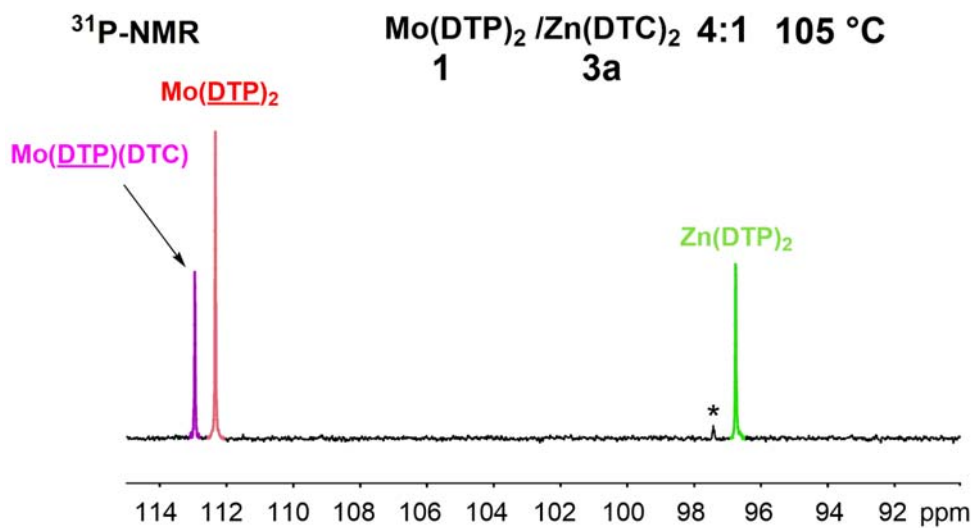

**Figure 10S:** Partial  $^1\text{H-NMR}$  spectra (3.0-5.0 ppm, 500 MHz,  $\text{CDCl}_3$ , 25  $^\circ\text{C}$ ) of a mixture of  $\text{Mo}(\text{DTP})_2$  **1** and  $\text{Zn}(\text{DTC})_2$  **3a** in a 1:1 molar ratio after (a) 1 h; (b) 17 h; (c) 95 h. \* : Impurities.

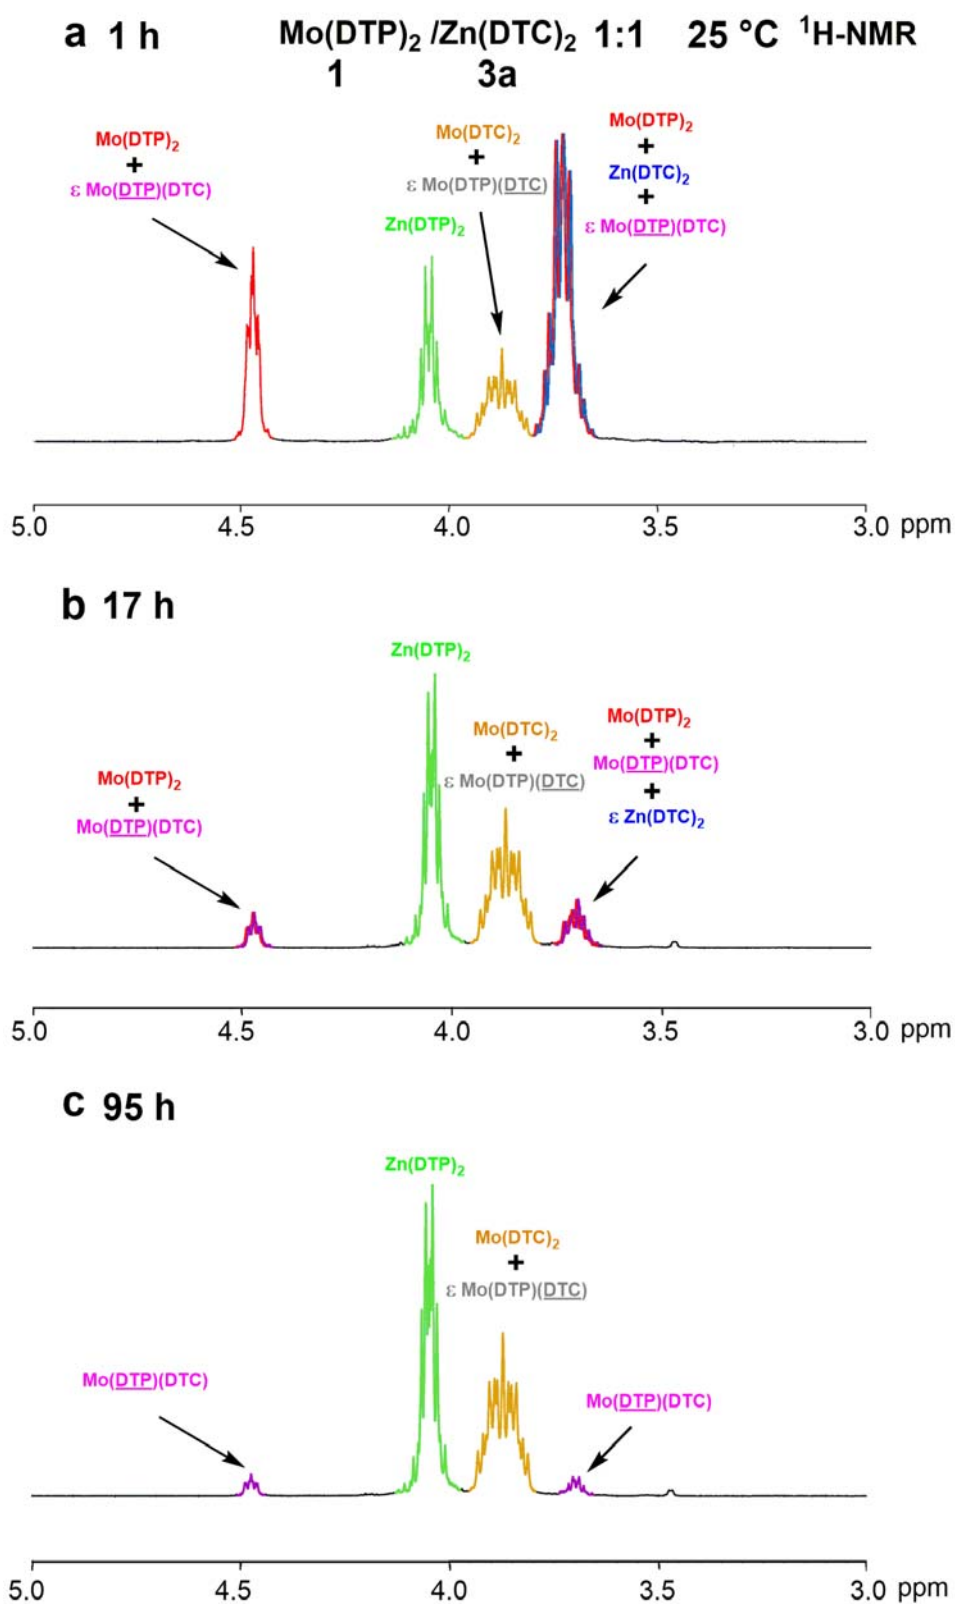

**Figure 11S:** Partial  $^{31}\text{P}$ -NMR spectra (90-115 ppm, 121 MHz,  $\text{CDCl}_3$ , 25 °C) of a mixture of  $\text{Mo}(\text{DTP})_2$  **1** and  $\text{Zn}(\text{DTC})_2$  **3a** in a 1:1 molar ratio after (a) 1 h, (b) 17 h; (c) 95 h. \* : Impurities.

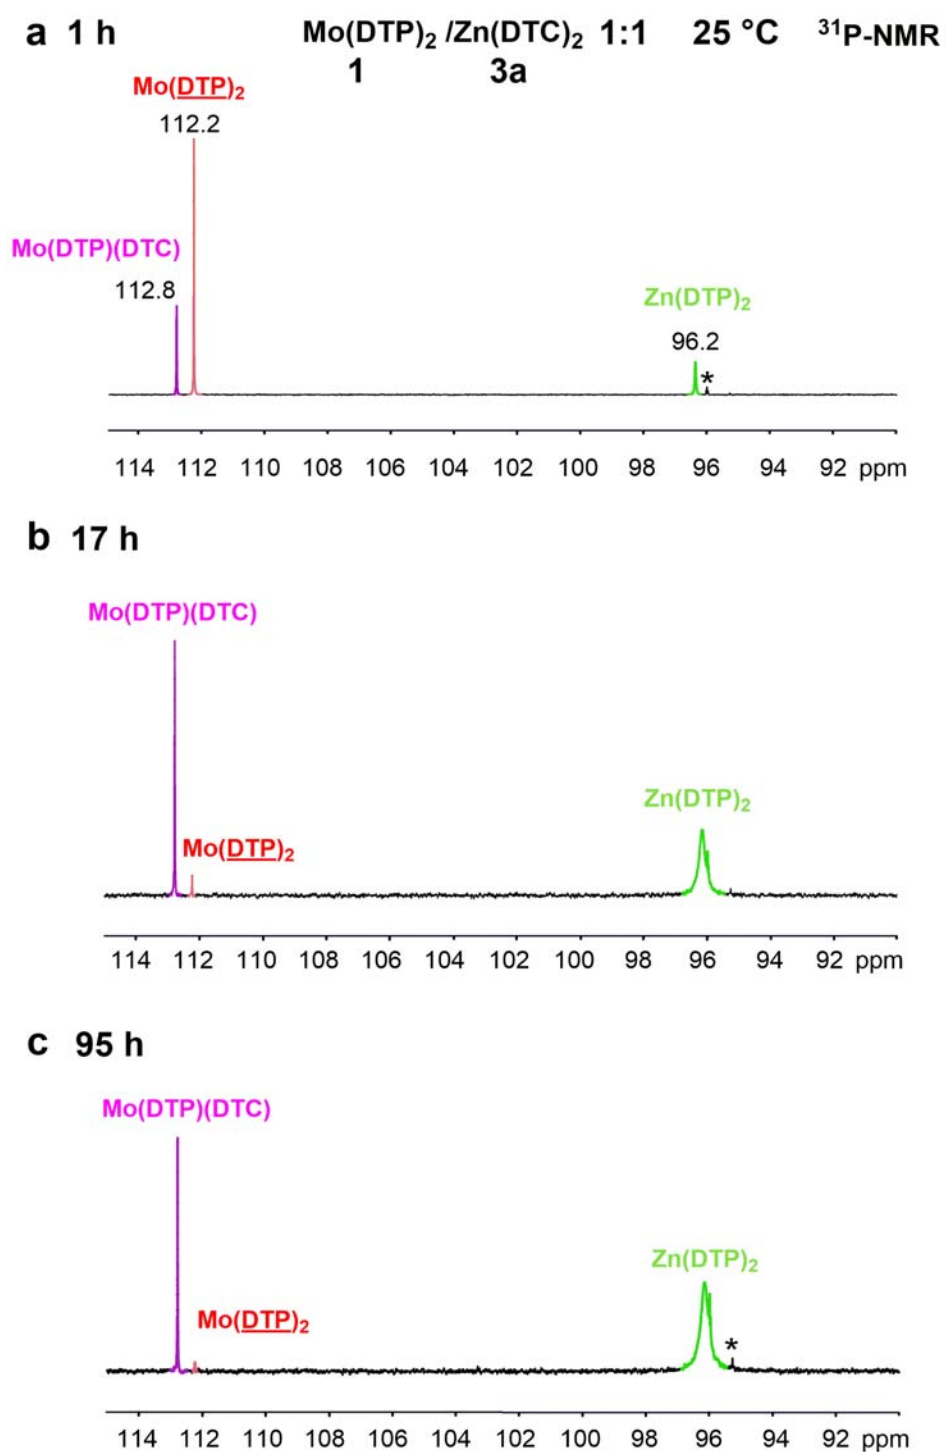

**Figure 12S:** Partial NMR spectra ( $\text{CDCl}_3$ , 25 °C) of a mixture of  $\text{Mo}(\text{DTC})_2$  **2d** and  $\text{Zn}(\text{DTP})_2$  **4a** in a 2:1 molar ratio after 24 h. **(a)**  $^1\text{H}$ -NMR spectrum (3.0-5.0 ppm, 500 MHz); **(b)**  $^{31}\text{P}$ -NMR spectrum (90-115 ppm, 121 MHz).

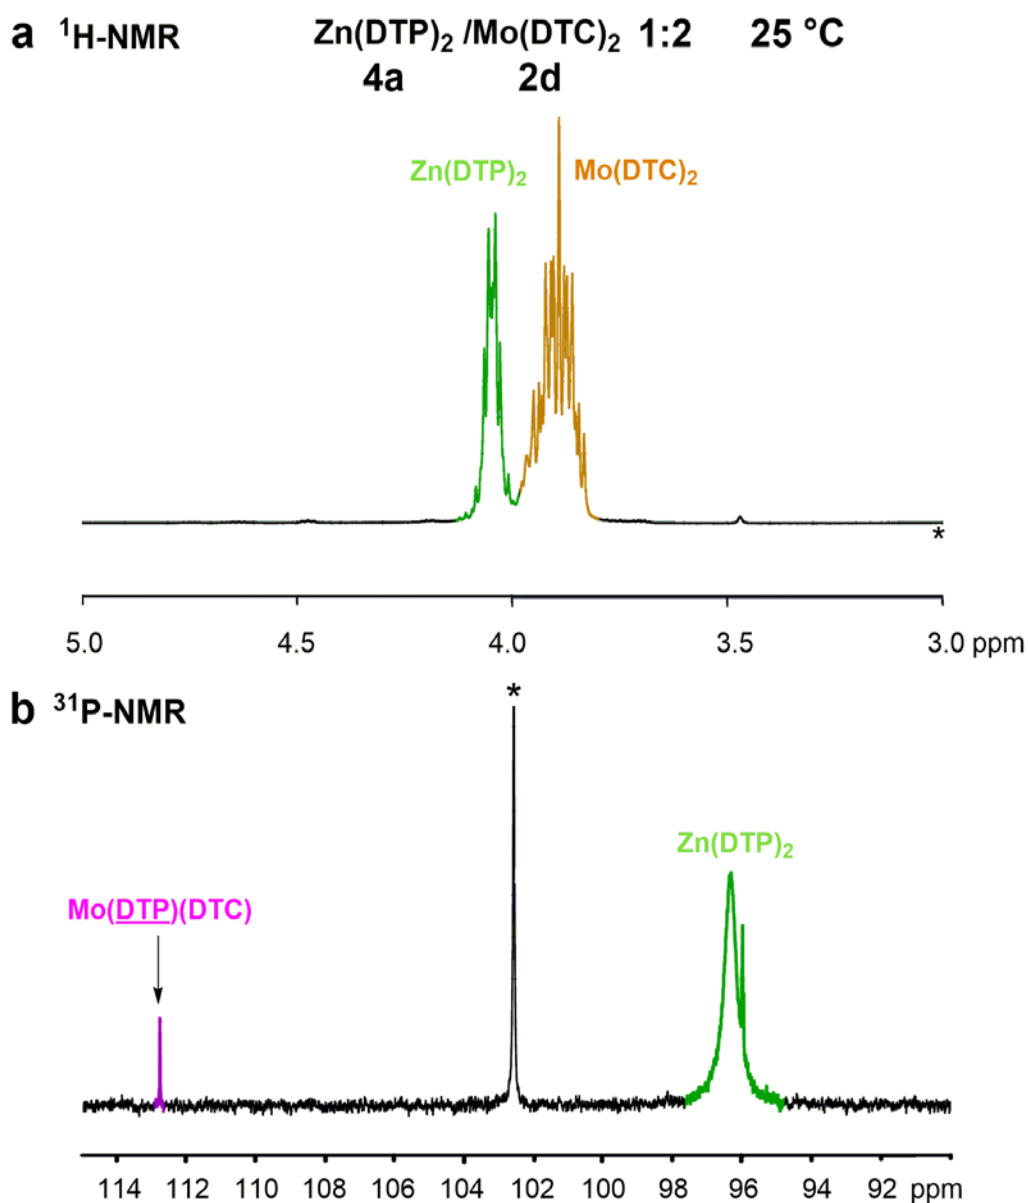

**Figure 13S: (a) Mass spectra and (b) Extracted Ion Chromatogram (HPLC-MS, APPI, positive mode) of compounds 2e, 2f, and 2g.**

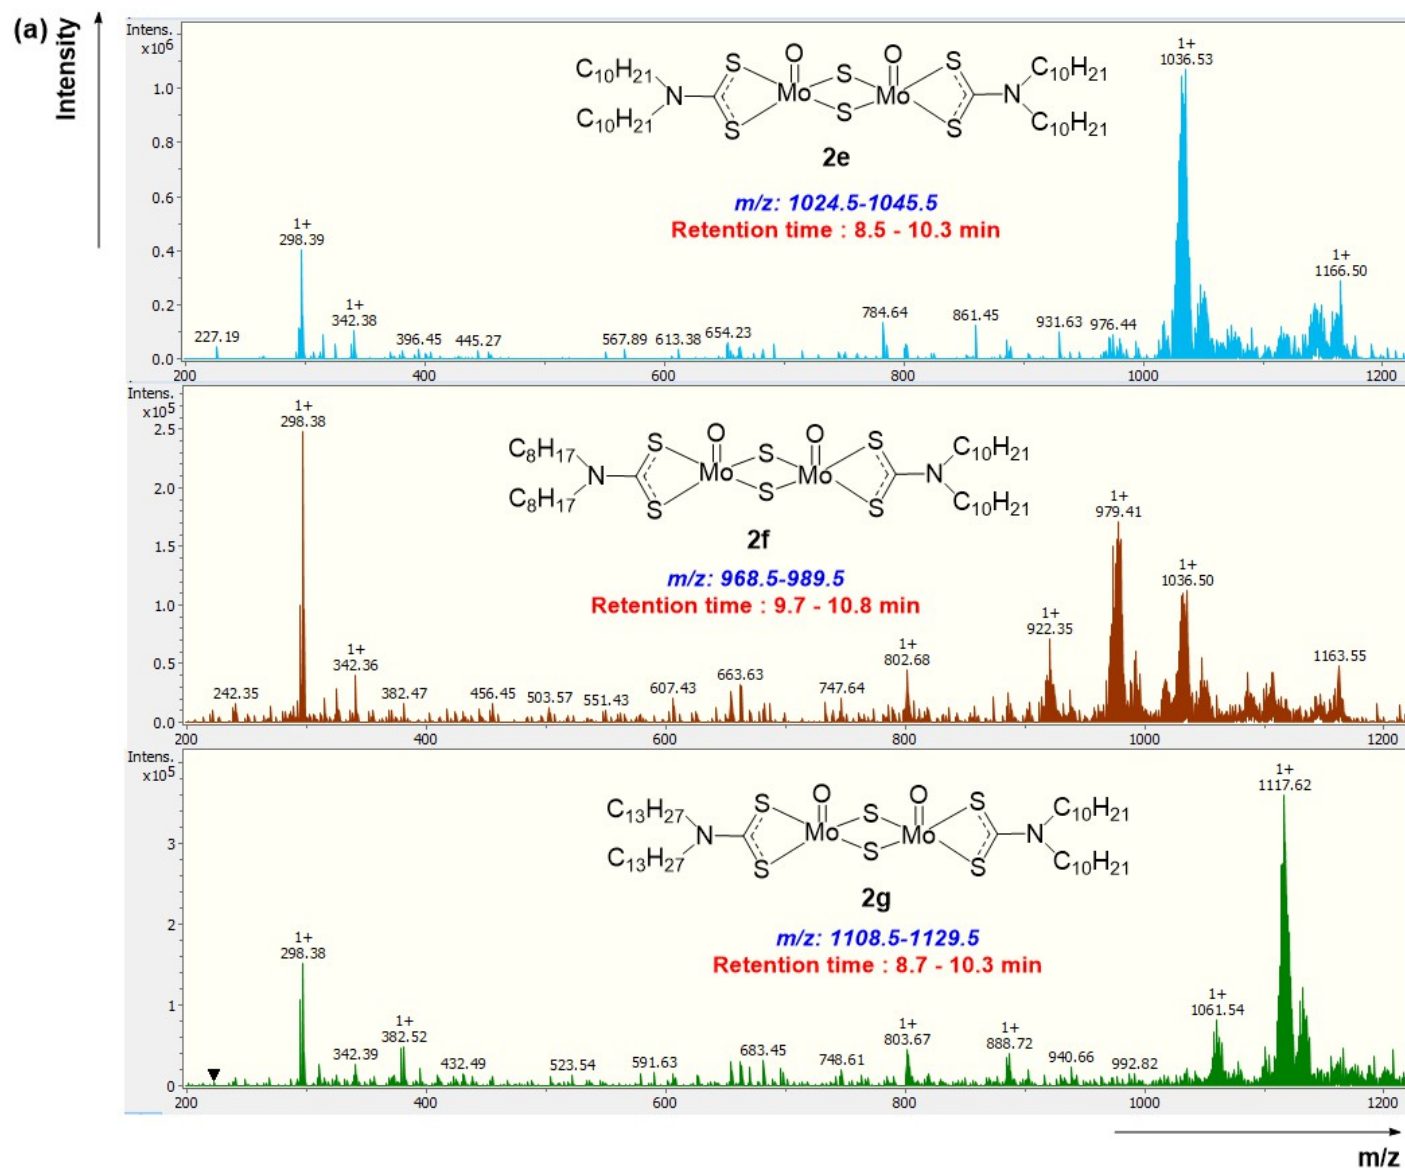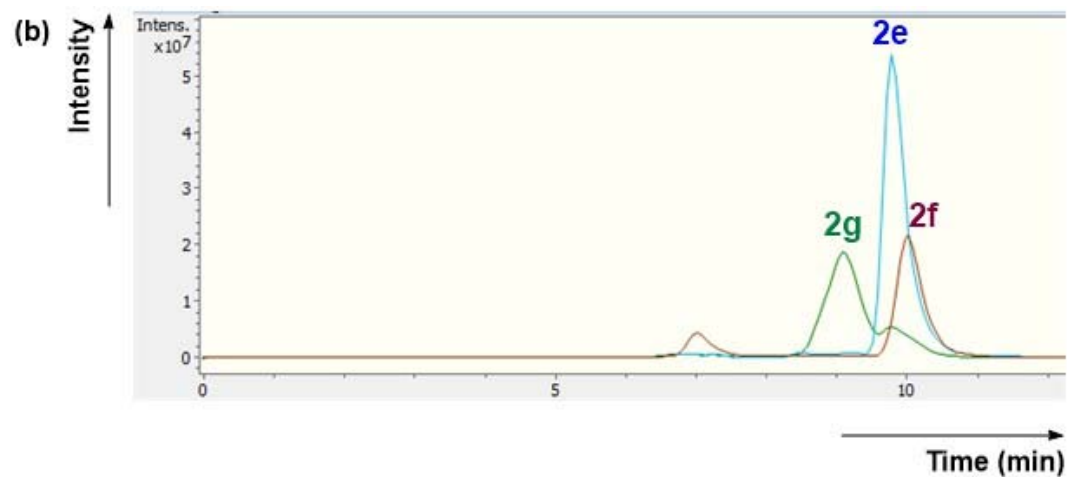

Supplement: d0ra07329f1.pdf [file d0ra07329f1.pdf]
